# Supplementary material for: Novel Integrated Flow-Based Steam Distillation and Titration System for Determination of Volatile Acidity in Wines
Source: MDPI journal article supplement (doi:10.3390/molecules26247673), 2021-12-18
Supplement: s1 [file s1]

# Novel Integrated Flow-Based Steam Distillation and Titration System for Determination of Volatile Acidity in Wines

Justyna Paluch <sup>1,\*</sup>, Joanna Kozak <sup>1,\*</sup>, Karolina Mermer <sup>1</sup>, Iwona Mołęda <sup>1</sup>, Marcin Wieczorek <sup>1</sup>, Sławomir Kalinowski <sup>2</sup> and Paweł Kościelniak <sup>1</sup>

<sup>1</sup> Faculty of Chemistry, Jagiellonian University, Gronostajowa 2, 30-387 Krakow, Poland; karolina.mermer@doctoral.uj.edu.pl (K.M.); iwonalo@interia.pl (I.M.); marcin.wieczorek@uj.edu.pl (M.W.); pawel.koscielniak@uj.edu.pl (P.K.)

<sup>2</sup> Department of Chemistry, University of Warmia and Mazury, Plac Łódzki 4, 10-957 Olsztyn, Poland; kalinow@uwm.edu.pl

\* Correspondence: justyna.paluch@uj.edu.pl (J.P.); j.kozak@uj.edu.pl (J.K.)

Table S1. Titration procedure using the system presented in Fig. 1; SV – selection valve, SP – syringe pump.

| Step                         | SV position |     |    | SP flow rate<br>[mL s <sup>-1</sup> ] |     |     | Volume, mL |      |      | Action                                                         |
|------------------------------|-------------|-----|----|---------------------------------------|-----|-----|------------|------|------|----------------------------------------------------------------|
|                              | II          | III | IV | II                                    | III | IV  | II         | III  | IV   |                                                                |
| Aspiration of solutions      |             |     |    |                                       |     |     |            |      |      |                                                                |
| 1                            | 1           | -   | -  | 100                                   | -   | -   | 1000       | -    | -    | Aspiration of sample into syringe                              |
| 2                            | 9           | -   | -  | 100                                   | -   | -   | 1000       | -    | -    | Transport sample to the waste                                  |
| Two repetitions of steps 1–2 |             |     |    |                                       |     |     |            |      |      |                                                                |
| 3                            | 1           | 1   | 1  | 100                                   | 100 | 200 | 1000       | 1000 | 2500 | Aspiration of sample, titrant and N <sub>2</sub> into syringes |
| Titration                    |             |     |    |                                       |     |     |            |      |      |                                                                |
| 4                            | 9           | -   | -  | 100                                   | -   | -   | 300        | -    | -    | Formation of zone I in mixing coil                             |
| 5                            | -           | -   | 9  | -                                     | -   | 100 | -          | -    | 200  | Introduction of N <sub>2</sub> into mixing coil                |
| 6                            | 9           | 9   | -  | 94                                    | 10  | -   | 295        | 5    | -    | Formation of zone II in mixing coil                            |
| 7                            | -           | -   | 9  | -                                     | -   | 100 | -          | -    | 200  | Introduction of N <sub>2</sub> into mixing coil                |
| 8                            | 9           | 9   | -  | 94                                    | 10  | -   | 290        | 10   | -    | Formation of zone III in mixing coil                           |
| 9                            | -           | -   | 9  | -                                     | -   | 100 | -          | -    | 200  | Introduction of N <sub>2</sub> into mixing coil                |
| 10                           | 1           | 1   | -  | 100                                   | 100 | -   | 885        | 15   | -    | Aspiration of sample and titrant into syringes                 |
| 11                           | 9           | 9   | -  | 94                                    | 10  | -   | 285        | 15   | -    | Formation of zone IV in mixing coil                            |
| 12                           | -           | -   | 9  | -                                     | -   | 100 | -          | -    | 200  | Introduction of N <sub>2</sub> into mixing coil                |
| 13                           | 9           | 9   | -  | 94                                    | 10  | -   | 280        | 20   | -    | Formation of zone V in mixing coil                             |
| 14                           | -           | -   | 9  | -                                     | -   | 100 | -          | -    | 200  | Introduction of N <sub>2</sub> into mixing coil                |
| 15                           | 9           | 9   | -  | 86                                    | 20  | -   | 275        | 25   | -    | Formation of zone VI in mixing coil                            |
| 16                           | -           | -   | 9  | -                                     | -   | 100 | -          | -    | 200  | Introduction of N <sub>2</sub> into mixing coil                |
| 17                           | 1           | 1   | 1  | 100                                   | 100 | 100 | 840        | 60   | 1200 | Aspiration of sample, titrant and N <sub>2</sub> into syringes |
| 18                           | 9           | 9   | -  | 86                                    | 20  | -   | 270        | 30   | -    | Formation of zone VII in mixing coil                           |
| 19                           | -           | -   | 9  | -                                     | -   | 100 | -          | -    | 200  | Introduction of N <sub>2</sub> into mixing coil                |

|    |   |   |   |     |     |     |     |     |      |                                                                |
|----|---|---|---|-----|-----|-----|-----|-----|------|----------------------------------------------------------------|
| 20 | 9 | 9 | - | 86  | 20  | -   | 265 | 35  | -    | Formation of zone VIII in mixing coil                          |
| 21 | - | - | 9 | -   | -   | 100 | -   | -   | 200  | Introduction of N <sub>2</sub> into mixing coil                |
| 22 | 9 | 9 | - | 86  | 20  | -   | 260 | 40  | -    | Formation of zone IX in mixing coil                            |
| 23 | - | - | 9 | -   | -   | 100 | -   | -   | 200  | Introduction of N <sub>2</sub> into mixing coil                |
| 24 | 1 | 1 | - | 100 | 100 | -   | 795 | 105 | -    | Aspiration of sample and titrant into syringes                 |
| 25 | 9 | 9 | - | 80  | 30  | -   | 255 | 45  | -    | Formation of zone X in mixing coil                             |
| 26 | - | - | 9 | -   | -   | 100 | -   | -   | 200  | Introduction of N <sub>2</sub> into mixing coil                |
| 27 | 9 | 9 | - | 80  | 30  | -   | 250 | 50  | -    | Formation of zone XI in mixing coil                            |
| 28 | - | - | 9 | -   | -   | 100 | -   | -   | 200  | Introduction of N <sub>2</sub> into mixing coil                |
| 29 | 9 | 9 | - | 80  | 30  | -   | 245 | 55  | -    | Formation of zone XII in mixing coil                           |
| 30 | - | - | 9 | -   | -   | 100 | -   | -   | 200  | Introduction of N <sub>2</sub> into mixing coil                |
|    | 1 | 1 | 1 | 100 | 100 | 100 | 750 | 150 | 1200 | Aspiration of sample, titrant and N <sub>2</sub> into syringes |
| 31 | 9 | 9 | - | 80  | 30  | -   | 240 | 60  | -    | Formation of zone XIII in mixing coil                          |
| 32 | - | - | 9 | -   | -   | 100 | -   | -   | 200  | Introduction of N <sub>2</sub> into mixing coil                |
| 33 | 9 | 9 | - | 74  | 40  | -   | 235 | 65  | -    | Formation of zone XIV in mixing coil                           |
| 34 | - | - | 9 | -   | -   | 100 | -   | -   | 200  | Introduction of N <sub>2</sub> into mixing coil                |
| 35 | 9 | 9 | - | 74  | 40  | -   | 235 | 65  | -    | Formation of zone XIV in mixing coil                           |
| 36 | - | - | 9 | -   | -   | 100 | -   | -   | 200  | Introduction of N <sub>2</sub> into mixing coil                |
| 37 | 9 | 9 | - | 74  | 40  | -   | 230 | 70  | -    | Formation of zone XV in mixing coil                            |
| 38 | - | - | 9 | -   | -   | 100 | -   | -   | 200  | Introduction of N <sub>2</sub> into mixing coil                |
| 39 | 1 | 1 | - | 100 | 100 | -   | 705 | 195 | -    | Aspiration of sample and titrant into syringes                 |
| 40 | 9 | 9 | - | 74  | 40  | -   | 225 | 75  | -    | Formation of zone XVI in mixing coil                           |
| 41 | - | - | 9 | -   | -   | 100 | -   | -   | 200  | Introduction of N <sub>2</sub> into mixing coil                |
| 42 | 9 | 9 | - | 74  | 40  | -   | 220 | 80  | -    | Formation of zone XVII in mixing coil                          |
| 43 | - | - | 9 | -   | -   | 100 | -   | -   | 200  | Introduction of N <sub>2</sub> into mixing coil                |
| 44 | 9 | 9 | - | 67  | 50  | -   | 215 | 85  | -    | Formation of zone XVIII in mixing coil                         |
| 45 | - | - | 9 | -   | -   | 100 | -   | -   | 200  | Introduction of N <sub>2</sub> into mixing coil                |
| 46 | 1 | 1 | 1 | 100 | 100 | 100 | 660 | 240 | 1200 | Aspiration of sample, titrant and N <sub>2</sub> into syringes |
| 47 | 9 | 9 | - | 67  | 50  | -   | 210 | 90  | -    | Formation of zone XIX in mixing coil                           |
| 48 | - | - | 9 | -   | -   | 100 | -   | -   | 200  | Introduction of N <sub>2</sub> into mixing coil                |
| 49 | 9 | 9 | - | 67  | 50  | -   | 205 | 95  | -    | Formation of zone XX in mixing coil                            |
| 50 | - | - | 9 | -   | -   | 100 | -   | -   | 200  | Introduction of N <sub>2</sub> into mixing coil                |
| 51 | 9 | 9 | - | 67  | 50  | -   | 200 | 100 | -    | Formation of zone XXI in mixing coil                           |
| 52 | - | - | 9 | -   | -   | 100 | -   | -   | 200  | Introduction of N <sub>2</sub> into mixing coil                |
| 53 | 1 | 1 | - | 100 | 100 | -   | 615 | 285 | -    | Aspiration of sample and titrant into syringes                 |
| 54 | 9 | 9 | - | 60  | 60  | -   | 195 | 105 | -    | Formation of zone XXII in mixing coil                          |
| 55 | - | - | 9 | -   | -   | 100 | -   | -   | 200  | Introduction of N <sub>2</sub> into mixing coil                |
| 56 | 9 | 9 | - | 60  | 60  | -   | 190 | 110 | -    | Formation of zone XXIII in mixing coil                         |

|    |   |   |   |     |     |     |     |     |      |                                                                |
|----|---|---|---|-----|-----|-----|-----|-----|------|----------------------------------------------------------------|
| 57 | - | - | 9 | -   | -   | 100 | -   | -   | 200  | Introduction of N <sub>2</sub> into mixing coil                |
| 58 | 9 | 9 | - | 60  | 60  | -   | 185 | 115 | -    | Formation of zone XXIV in mixing coil                          |
| 59 | - | - | 9 | -   | -   | 100 | -   | -   | 200  | Introduction of N <sub>2</sub> into mixing coil                |
| 60 | 1 | 1 | 1 | 100 | 100 | 100 | 570 | 330 | 1200 | Aspiration of sample, titrant and N <sub>2</sub> into syringes |
| 61 | 9 | 9 | - | 60  | 60  | -   | 180 | 120 | -    | Formation of zone XXV in mixing coil                           |
| 62 | - | - | 9 | -   | -   | 100 | -   | -   | 200  | Introduction of N <sub>2</sub> into mixing coil                |
| 63 | 9 | 9 | - | 54  | 70  | -   | 175 | 125 | -    | Formation of zone XXVI in mixing coil                          |
| 64 | - | - | 9 | -   | -   | 100 | -   | -   | 200  | Introduction of N <sub>2</sub> into mixing coil                |
| 65 | 9 | 9 | - | 54  | 70  | -   | 170 | 130 | -    | Formation of zone XXVII in mixing coil                         |
| 66 | - | - | 9 | -   | -   | 100 | -   | -   | 200  | Introduction of N <sub>2</sub> into mixing coil                |
| 67 | 1 | 1 | - | 100 | 100 | -   | 525 | 375 | -    | Aspiration of sample and titrant into syringes                 |
| 68 | 9 | 9 | - | 54  | 70  | -   | 165 | 135 | -    | Formation of zone XXVIII in mixing coil                        |
| 69 | - | - | 9 | -   | -   | 100 | -   | -   | 200  | Introduction of N <sub>2</sub> into mixing coil                |
| 70 | 9 | 9 | - | 54  | 70  | -   | 160 | 140 | -    | Formation of zone XXIX in mixing coil                          |
| 71 | - | - | 9 | -   | -   | 100 | -   | -   | 200  | Introduction of N <sub>2</sub> into mixing coil                |
| 72 | 9 | 9 | - | 47  | 80  | -   | 155 | 145 | -    | Formation of zone XXX in mixing coil                           |
| 73 | - | - | 9 | -   | -   | 100 | -   | -   | 200  | Introduction of N <sub>2</sub> into mixing coil                |
| 74 | 1 | 1 | 1 | 100 | 100 | 100 | 480 | 420 | 1200 | Aspiration of sample, titrant and N <sub>2</sub> into syringes |
| 75 | 9 | 9 | - | 47  | 80  | -   | 150 | 150 | -    | Formation of zone XXXI in mixing coil                          |
| 76 | - | - | 9 | -   | -   | 100 | -   | -   | 200  | Introduction of N <sub>2</sub> into mixing coil                |
| 77 | 9 | 9 | - | 47  | 80  | -   | 145 | 155 | -    | Formation of zone XXXII in mixing coil                         |
| 78 | - | - | 9 | -   | -   | 100 | -   | -   | 200  | Introduction of N <sub>2</sub> into mixing coil                |
| 79 | 9 | 9 | - | 47  | 80  | -   | 140 | 160 | -    | Formation of zone XXXIII in mixing coil                        |
| 80 | - | - | 9 | -   | -   | 100 | -   | -   | 200  | Introduction of N <sub>2</sub> into mixing coil                |
| 81 | 1 | 1 | - | 100 | 100 | -   | 435 | 465 | -    | Aspiration of sample and titrant into syringes                 |
| 82 | 9 | 9 | - | 40  | 90  | -   | 135 | 165 | -    | Formation of zone XXXIV in mixing coil                         |
| 83 | - | - | 9 | -   | -   | 100 | -   | -   | 200  | Introduction of N <sub>2</sub> into mixing coil                |
| 84 | 9 | 9 | - | 40  | 90  | -   | 130 | 170 | -    | Formation of zone XXXV in mixing coil                          |
| 85 | - | - | 9 | -   | -   | 100 | -   | -   | 200  | Introduction of N <sub>2</sub> into mixing coil                |
| 86 | 9 | 9 | - | 40  | 90  | -   | 125 | 175 | -    | Formation of zone XXXVI in mixing coil                         |
| 87 | - | - | 9 | -   | -   | 100 | -   | -   | 200  | Introduction of N <sub>2</sub> into mixing coil                |
| 88 | 1 | 1 | 1 | 100 | 100 | 100 | 390 | 510 | 1200 | Aspiration of sample, titrant and N <sub>2</sub> into syringes |
| 89 | 9 | 9 | - | 40  | 90  | -   | 120 | 180 | -    | Formation of zone XXXVII in mixing coil                        |
| 90 | - | - | 9 | -   | -   | 100 | -   | -   | 200  | Introduction of N <sub>2</sub> into mixing coil                |
| 91 | 9 | 9 | - | 34  | 100 | -   | 115 | 185 | -    | Formation of zone XXXVIII in mixing coil                       |
| 92 | - | - | 9 | -   | -   | 100 | -   | -   | 200  | Introduction of N <sub>2</sub> into mixing coil                |
| 93 | 9 | 9 | - | 34  | 100 | -   | 110 | 190 | -    | Formation of zone XXXIX in mixing coil                         |
| 94 | - | - | 9 | -   | -   | 100 | -   | -   | 200  | Introduction of N <sub>2</sub> into mixing coil                |

|     |   |   |   |     |     |     |     |     |      |                                                                |
|-----|---|---|---|-----|-----|-----|-----|-----|------|----------------------------------------------------------------|
| 95  | 1 | 1 | - | 100 | 100 | -   | 345 | 555 | -    | Aspiration of sample and titrant into syringes                 |
| 96  | 9 | 9 | - | 34  | 100 | -   | 105 | 195 | -    | Formation of zone XL in mixing coil                            |
| 97  | - | - | 9 | -   | -   | 100 | -   | -   | 200  | Introduction of N <sub>2</sub> into mixing coil                |
| 98  | 9 | 9 | - | 34  | 100 | -   | 100 | 200 | -    | Formation of zone XLI in mixing coil                           |
| 99  | - | - | 9 | -   | -   | 100 | -   | -   | 200  | Introduction of N <sub>2</sub> into mixing coil                |
| 100 | 9 | 9 | - | 27  | 100 | -   | 95  | 205 | -    | Formation of zone XLII in mixing coil                          |
| 101 | - | - | 9 | -   | -   | 100 | -   | -   | 200  | Introduction of N <sub>2</sub> into mixing coil                |
| 102 | 1 | 1 | 1 | 100 | 100 | 100 | 300 | 600 | 1200 | Aspiration of sample, titrant and N <sub>2</sub> into syringes |
| 103 | 9 | 9 | - | 27  | 100 | -   | 90  | 210 | -    | Formation of zone XLIII in mixing coil                         |
| 104 | - | - | 9 | -   | -   | 100 | -   | -   | 200  | Introduction of N <sub>2</sub> into mixing coil                |
| 105 | 9 | 9 | - | 27  | 100 | -   | 85  | 215 | -    | Formation of zone XLIV in mixing coil                          |
| 106 | - | - | 9 | -   | -   | 100 | -   | -   | 200  | Introduction of N <sub>2</sub> into mixing coil                |
| 107 | 9 | 9 | - | 27  | 100 | -   | 80  | 220 | -    | Formation of zone XLV in mixing coil                           |
| 108 | - | - | 9 | -   | -   | 100 | -   | -   | 200  | Introduction of N <sub>2</sub> into mixing coil                |
| 109 | 1 | 1 | - | 100 | 100 | -   | 255 | 645 | -    | Aspiration of sample and titrant into syringes                 |
| 110 | 9 | 9 | - | 20  | 100 | -   | 75  | 225 | -    | Formation of zone XLVI in mixing coil                          |
| 111 | - | - | 9 | -   | -   | 100 | -   | -   | 200  | Introduction of N <sub>2</sub> into mixing coil                |
| 112 | 9 | 9 | - | 20  | 100 | -   | 70  | 230 | -    | Formation of zone XLVII in mixing coil                         |
| 113 | - | - | 9 | -   | -   | 100 | -   | -   | 200  | Introduction of N <sub>2</sub> into mixing coil                |
| 114 | 9 | 9 | - | 20  | 100 | -   | 65  | 235 | -    | Formation of zone XLVIII in mixing coil                        |
| 115 | - | - | 9 | -   | -   | 100 | -   | -   | 200  | Introduction of N <sub>2</sub> into mixing coil                |
| 116 | 1 | 1 | 1 | 100 | 100 | 100 | 210 | 690 | 1200 | Aspiration of sample, titrant and N <sub>2</sub> into syringes |
| 117 | 9 | 9 | - | 20  | 100 | -   | 60  | 240 | -    | Formation of zone XLIX in mixing coil                          |
| 118 | - | - | 9 | -   | -   | 100 | -   | -   | 200  | Introduction of N <sub>2</sub> into mixing coil                |
| 119 | 9 | 9 | - | 14  | 100 | -   | 55  | 245 | -    | Formation of zone L in mixing coil                             |
| 120 | - | - | 9 | -   | -   | 100 | -   | -   | 200  | Introduction of N <sub>2</sub> into mixing coil                |
| 121 | 9 | 9 | - | 14  | 100 | -   | 50  | 250 | -    | Formation of zone LI in mixing coil                            |
| 122 | - | - | 9 | -   | -   | 100 | -   | -   | 200  | Introduction of N <sub>2</sub> into mixing coil                |
| 123 | 1 | 1 | - | 100 | 100 | -   | 255 | 645 | -    | Aspiration of sample and titrant into syringes                 |
| 124 | 9 | 9 | - | 14  | 100 | -   | 45  | 255 | -    | Formation of zone LII in mixing coil                           |
| 125 | - | - | 9 | -   | -   | 100 | -   | -   | 200  | Introduction of N <sub>2</sub> into mixing coil                |
| 126 | 9 | 9 | - | 14  | 100 | -   | 40  | 260 | -    | Formation of zone LIII in mixing coil                          |
| 127 | - | - | 9 | -   | -   | 100 | -   | -   | 200  | Introduction of N <sub>2</sub> into mixing coil                |
| 128 | 9 | 9 | - | 7   | 100 | -   | 35  | 265 | -    | Formation of zone LIV in mixing coil                           |
| 129 | - | - | 9 | -   | -   | 100 | -   | -   | 200  | Introduction of N <sub>2</sub> into mixing coil                |
| 130 | 1 | 1 | 1 | 100 | 100 | 100 | 120 | 780 | 1200 | Aspiration of sample, titrant and N <sub>2</sub> into syringes |
| 131 | 9 | 9 | - | 7   | 100 | -   | 30  | 265 | -    | Formation of zone LV in mixing coil                            |
| 132 | - | - | 9 | -   | -   | 100 | -   | -   | 200  | Introduction of N <sub>2</sub> into mixing coil                |

|     |   |   |   |     |     |     |    |     |     |                                                 |
|-----|---|---|---|-----|-----|-----|----|-----|-----|-------------------------------------------------|
| 133 | 9 | 9 | - | 7   | 100 | -   | 25 | 275 | -   | Formation of zone LVI in mixing coil            |
| 134 | - | - | 9 | -   | -   | 100 | -  | -   | 200 | Introduction of N <sub>2</sub> into mixing coil |
| 135 | 9 | 9 | - | 7   | 100 | -   | 20 | 280 | -   | Formation of zone LVII in mixing coil           |
| 136 | - | - | 9 | -   | -   | 100 | -  | -   | 200 | Introduction of N <sub>2</sub> into mixing coil |
| 137 | 1 | 1 | - | 100 | 100 | -   | 75 | 825 | -   | Aspiration of sample and titrant into syringes  |
| 138 | 9 | 9 | - | 4   | 100 | -   | 15 | 285 | -   | Formation of zone LVIII in mixing coil          |
| 139 | - | - | 9 | -   | -   | 100 | -  | -   | 200 | Introduction of N <sub>2</sub> into mixing coil |
| 140 | 9 | 9 | - | 4   | 100 | -   | 10 | 290 | -   | Formation of zone LIX in mixing coil            |
| 141 | - | - | 9 | -   | -   | 100 | -  | -   | 200 | Introduction of N <sub>2</sub> into mixing coil |
| 142 | 9 | 9 | - | 4   | 100 | -   | 5  | 295 | -   | Formation of zone LX in mixing coil             |
| 143 | - | - | 9 | -   | -   | 100 | -  | -   | 200 | Introduction of N <sub>2</sub> into mixing coil |
| 144 | 1 | 1 | - | 100 | 100 | -   | 30 | 870 | -   | Aspiration of sample and titrant into syringes  |
| 145 | - | 9 | - | -   | 100 | -   | 0  | 300 | -   | Formation of zone LXI in mixing coil            |
| 146 | - | - | 9 | -   | -   | 100 | -  | -   | 200 | Introduction of N <sub>2</sub> into mixing coil |

---
